# Supplementary material for: Development of photoactivable glycerol-based coatings containing quercetin for antibacterial applications
Source: Royal Society of Chemistry journal article supplement (doi:10.1039/c5ra25267a), 2016-01-01
Supplement: c5ra25267a1.pdf [file c5ra25267a1.pdf]

## SUPPORTING INFORMATION

### **Development of photoactivable glycerol-based coatings containing quercetin for antibacterial applications**

Michael Condat, Julien Babinot, Somia Toumane, Jean-Pierre Malval, Inn-Kyu Kang, Faustine Spillebout, Pierre-Emmanuel Mazeran, Jacques Lalevée, Samir Abbad Andalloussi, Davy-Louis Versace\*.

**Figure S1.**

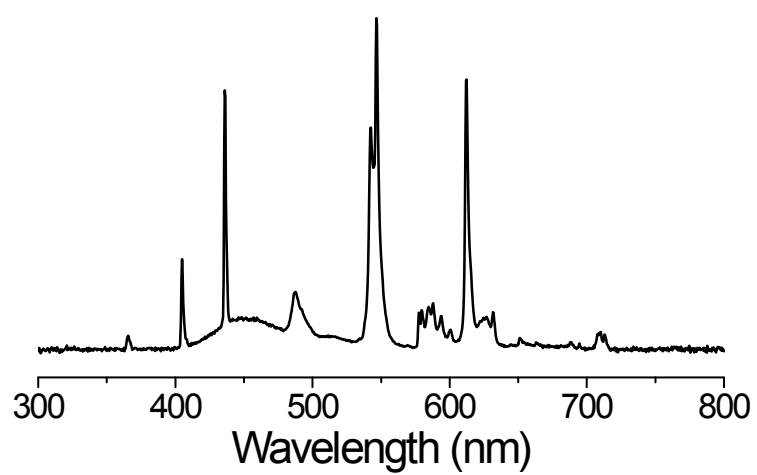

**Figure S1.** Emission spectrum of the lamps used during the different incubation times.

**Figure S2.**

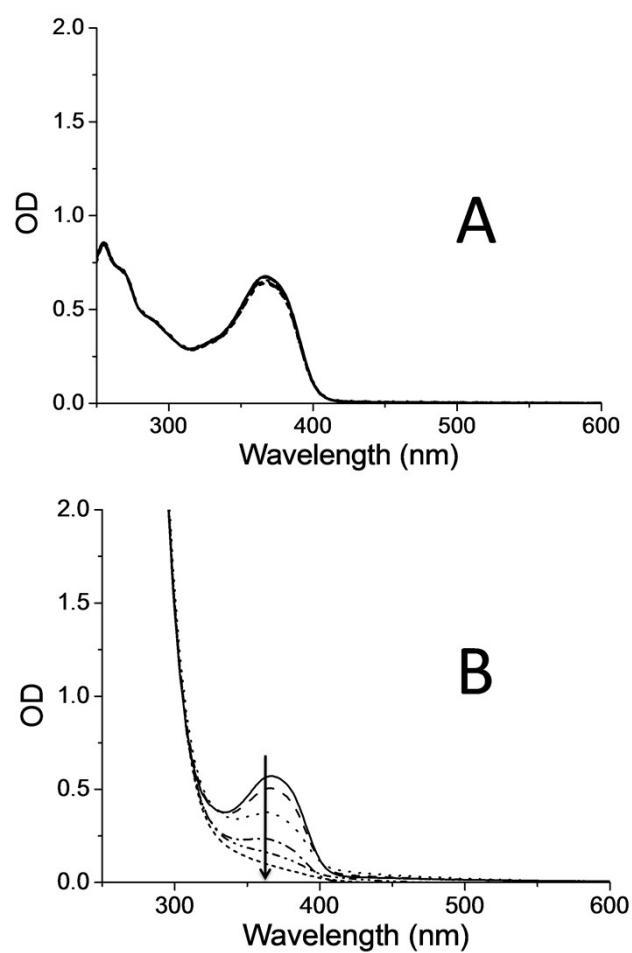

**Figure S2.** Evolution of the UV-visible spectra of A) quercetin alone and B) quercetin/Iod in ACN during irradiation. [Quercetin] =  $3.5 \times 10^{-5}$  M and [Iod] =  $8.6 \times 10^{-4}$  mol/L. ( $I = 70$  mW.cm<sup>-2</sup>)

**Figure S3.**

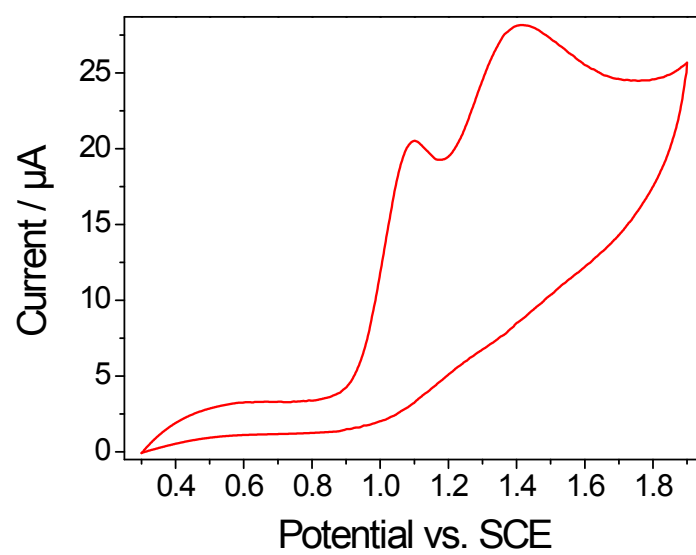

**Figure S3.** Cyclic voltammetry of quercetin in ACN

**Figure S4.**

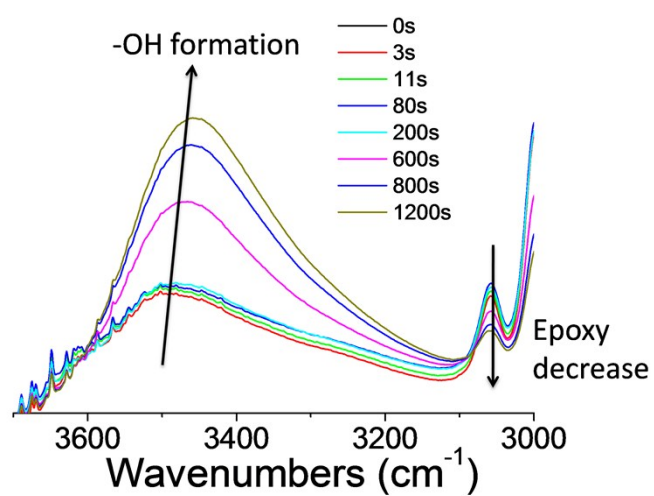

**Figure S4.** Evolution of the –OH band from the resulting polyether network during the 1200s of irradiation

**Figure S5.**

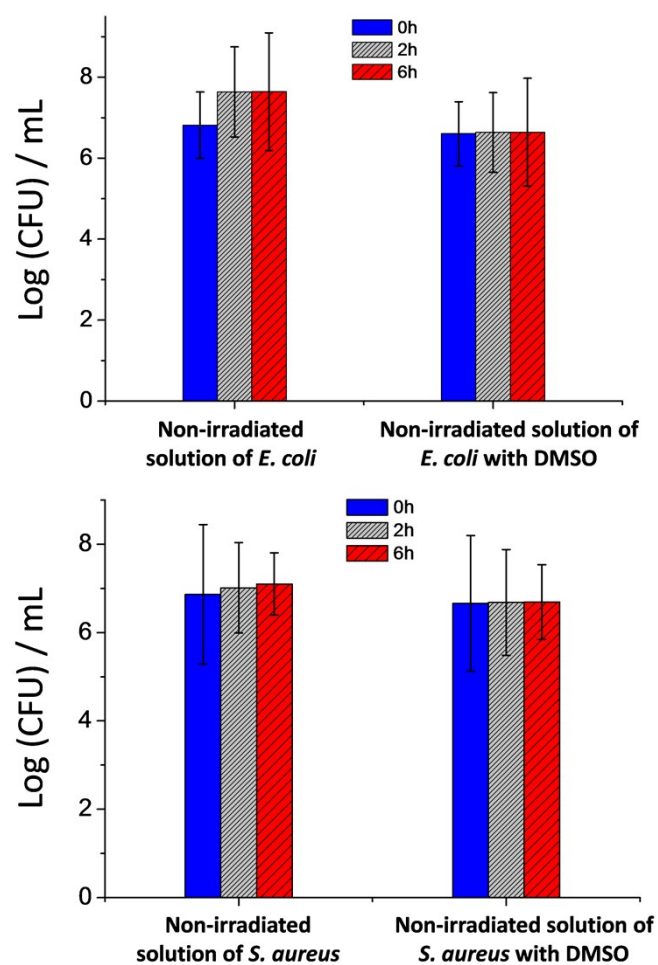

**Figure S5.** Influence of the incubation time (0, 2h, 6h), without illumination, on the growth of A) *E. coli* and B) *S. aureus* with and without DMSO.

**Figure S6.**

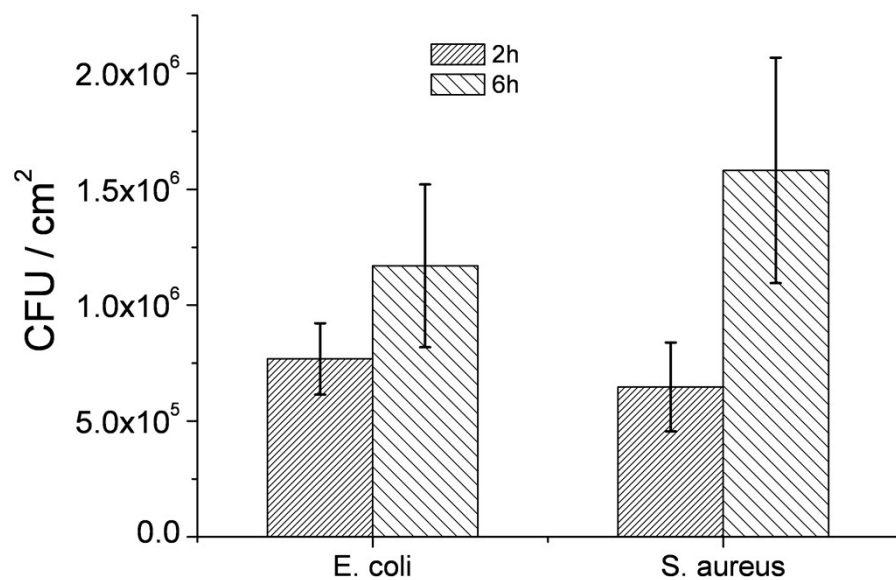

**Figure S6.** Evolution of the adhesion/proliferation of *E. coli* and *S. aureus* on the stainless steel substrate without coating.
